# Supplementary material for: Transition metal-induced excess electron localization driving the giant first hyperpolarizability in alkaline earthides: a DFT and TD-DFT study
Source: Royal Society of Chemistry journal article supplement (doi:10.1039/d6ra02261h), 2026-06-04
Supplement: d6ra02261h1.pdf [file d6ra02261h1.pdf]

## **Transition Metal Induced Excess Electron Localization Driving Giant First Hyperpolarizability in Alkaline Earthides: A DFT and TD-DFT Study**

Jabir Hussain\*<sup>a</sup>, Riaz Hussain\*<sup>b</sup>, Dua Tahreem<sup>b</sup>, Annum Ahsan<sup>c</sup>, Muhammad Arshad <sup>a</sup>, Khurshid Ayub<sup>c</sup>

<sup>a</sup>*Institute of Chemistry, The Islamia University of Bahawalpur, Bahawalpur, 63100, Pakistan*

<sup>b</sup>*Division of Science and Technology, Department of chemistry, University of education Lahore, Campus D.G khan, Dera Ghazi khan, 32200, Pakistan*

<sup>c</sup>*Department of Chemistry, COMSATS University, Abbottabad Campus, Abbottabad, 22060, Pakistan*

### **\*Corresponding authors:**

Riaz Hussain

E-Mail: [riaz.hussain@ue.edu.pk](mailto:riaz.hussain@ue.edu.pk), Contact: [0092-3336364880](tel:0092-3336364880), ORCID ID: [0000-0002-6154-1244](https://orcid.org/0000-0002-6154-1244)

Jabir Hussain

E-Mail: [chemistjabir@gmail.com](mailto:chemistjabir@gmail.com), Contact: [0092-3428579289](tel:0092-3428579289), ORCID ID: [0009-0000-6314-6021](https://orcid.org/0009-0000-6314-6021)

### **Authors:**

Jabir Hussain: [chemistjabir@gmail.com](mailto:chemistjabir@gmail.com)

Riaz Hussain: [riaz.hussain@ue.edu.pk](mailto:riaz.hussain@ue.edu.pk)

Dua Tahreem: [duatahreem06@gmail.com](mailto:duatahreem06@gmail.com)

Annum Ahsan: [annumahsan12@gmail.com](mailto:annumahsan12@gmail.com)

Muhammad Arshad: [muhammad.arshad@iub.edu.pk](mailto:muhammad.arshad@iub.edu.pk)

Khurshid Ayub: [khurshid@cuiatd.edu.pk](mailto:khurshid@cuiatd.edu.pk)

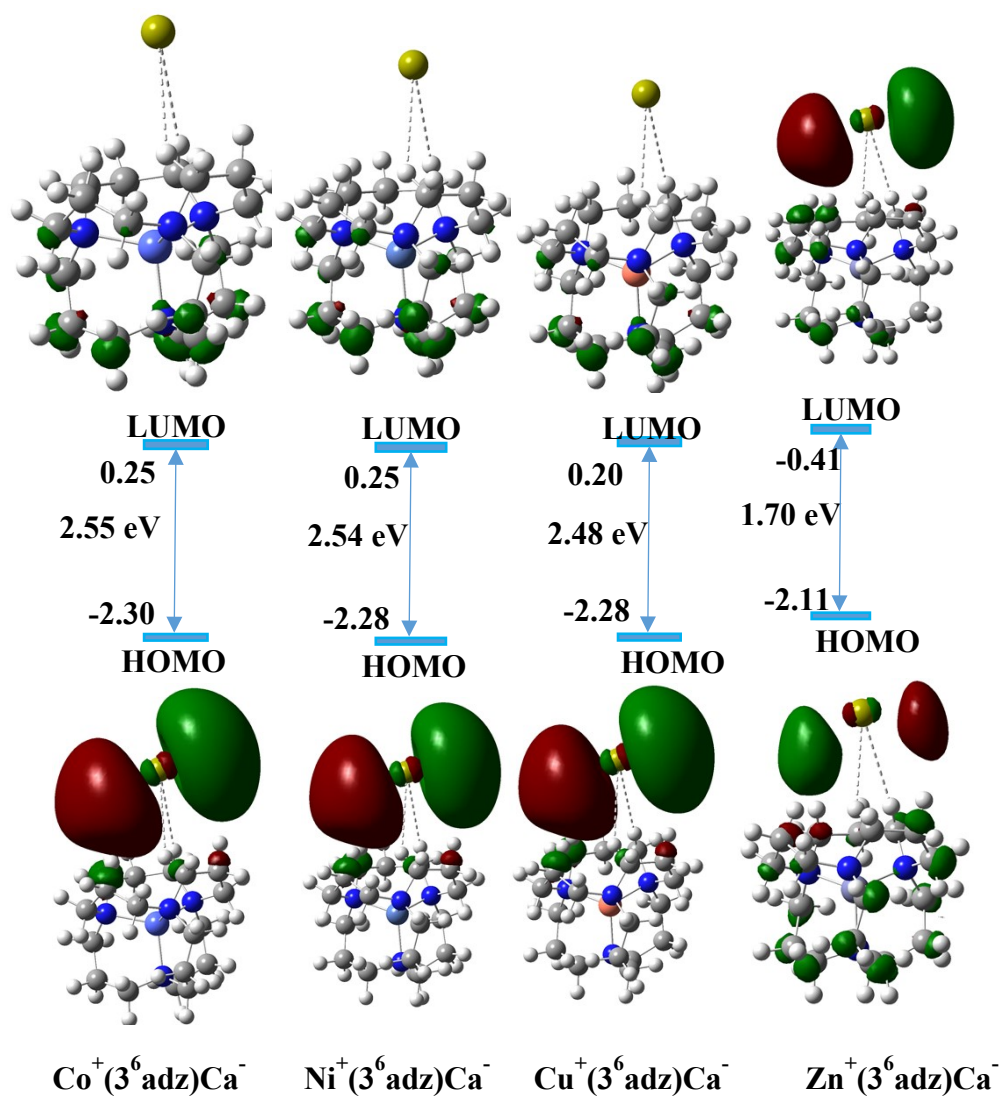

**Fig S1.** The HOMO and LUMO of  $\text{M}^+(3^6\text{adz})\text{Ca}^-$  (here  $\text{M}^+$  is Co to Zn) series plotted on iso-value of 0.02.

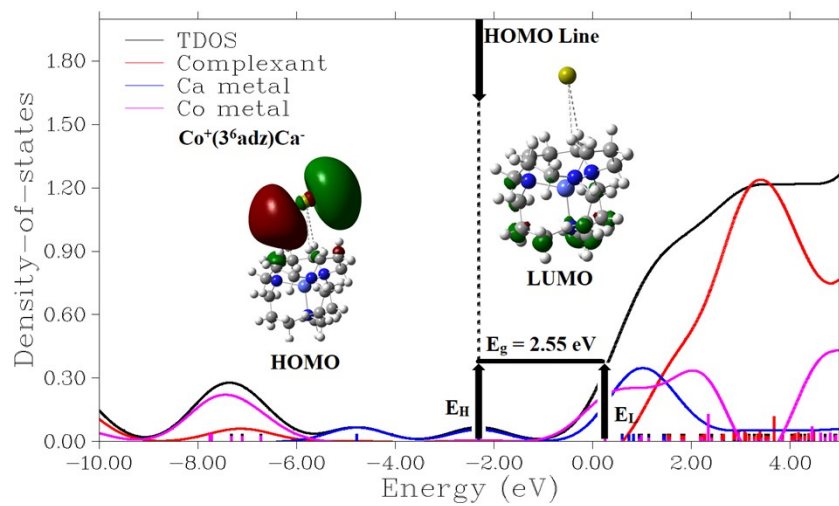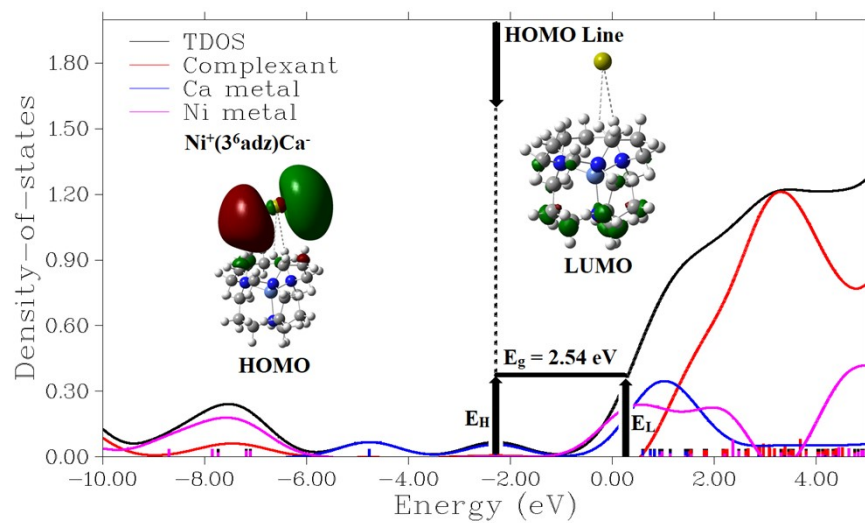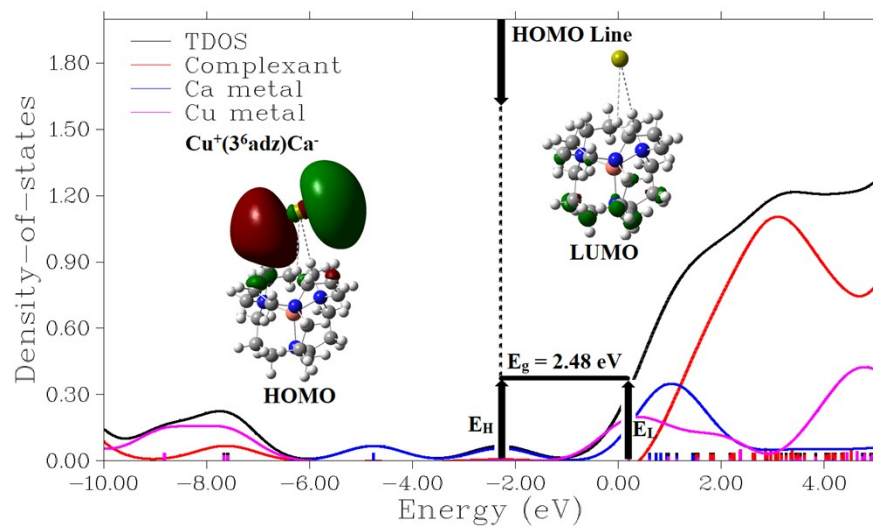

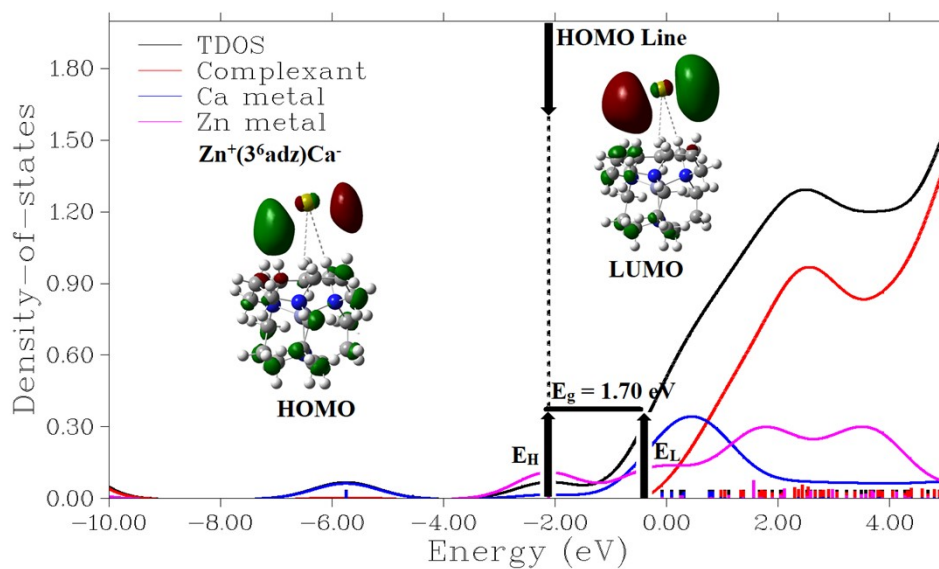

**Fig S2.** The PDOS spectra of  $M^+(3^6\text{adz})\text{Ca}^-$  (here  $M^+ = \text{Co}$  to  $\text{Zn}$ ) series generated by using Multiwfn

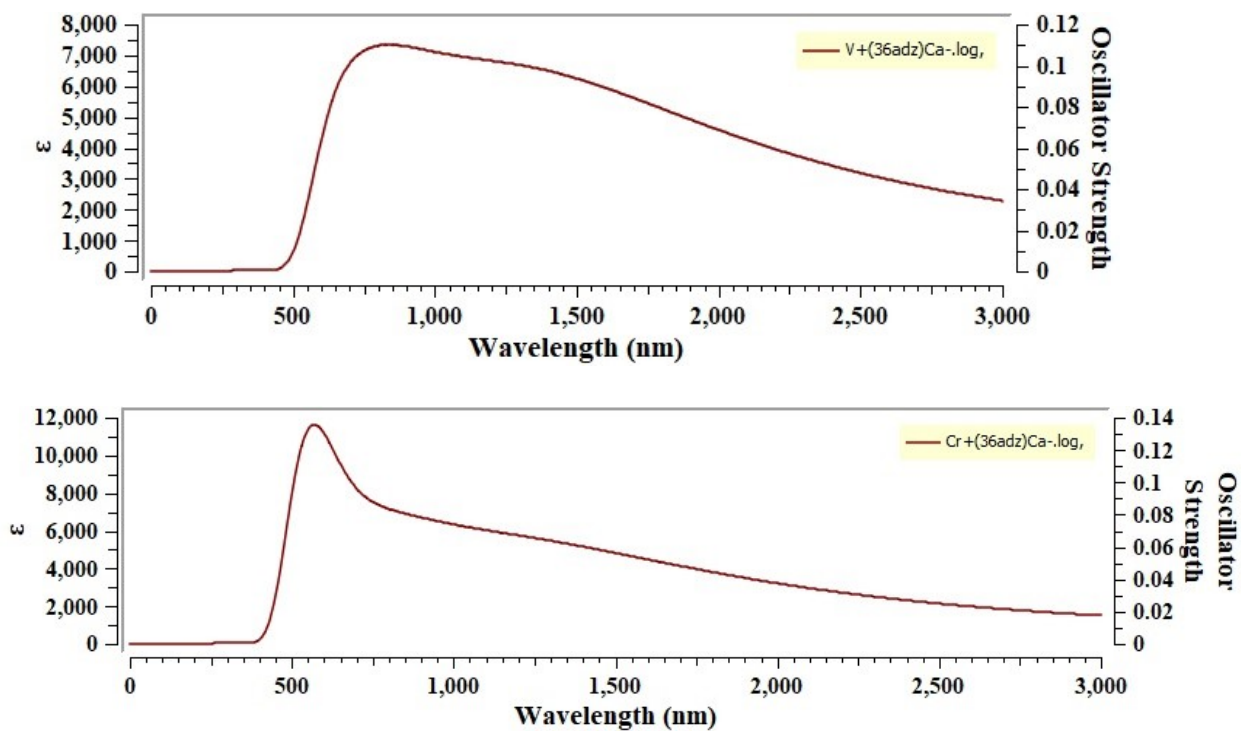

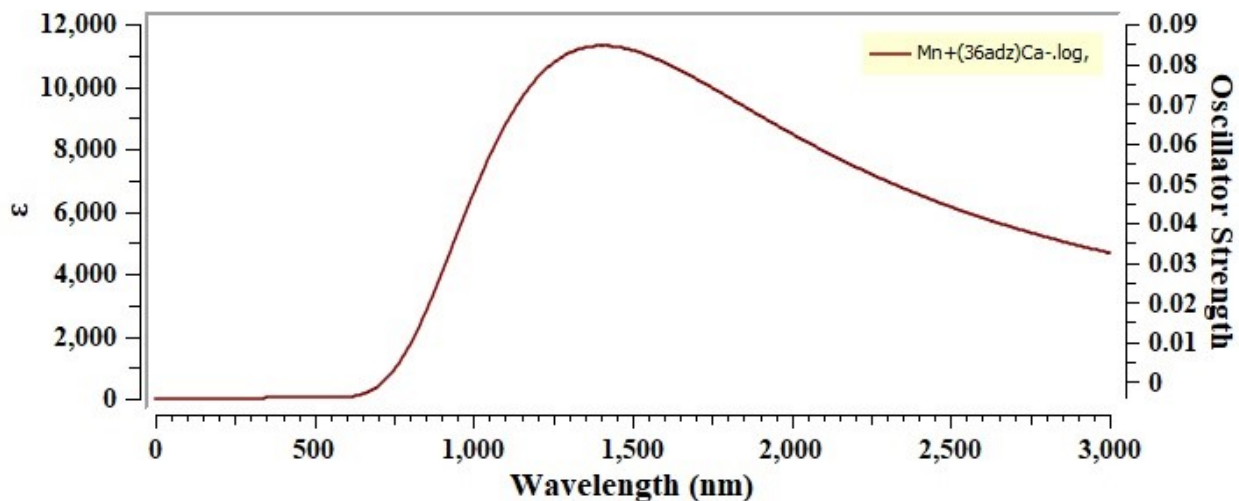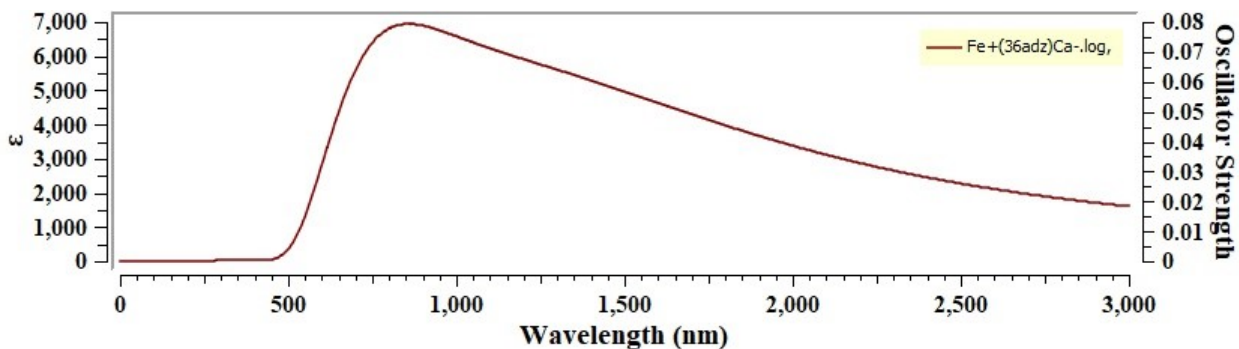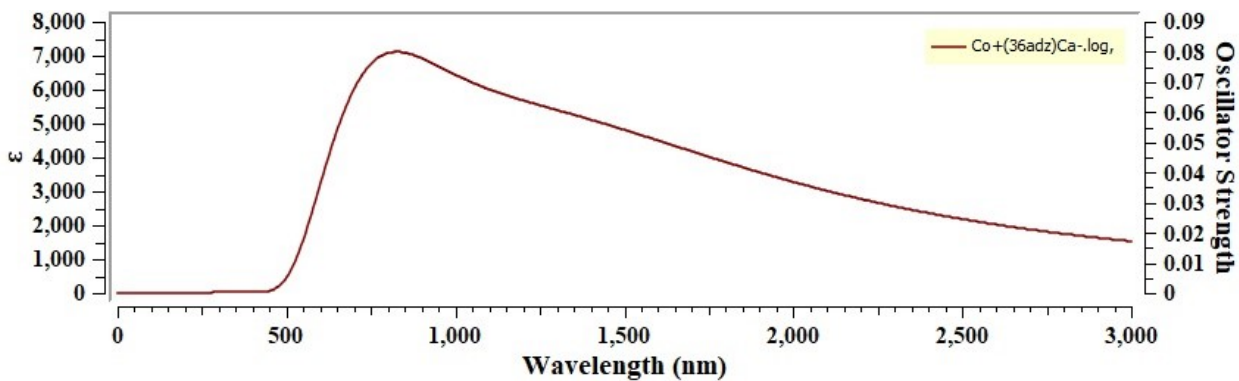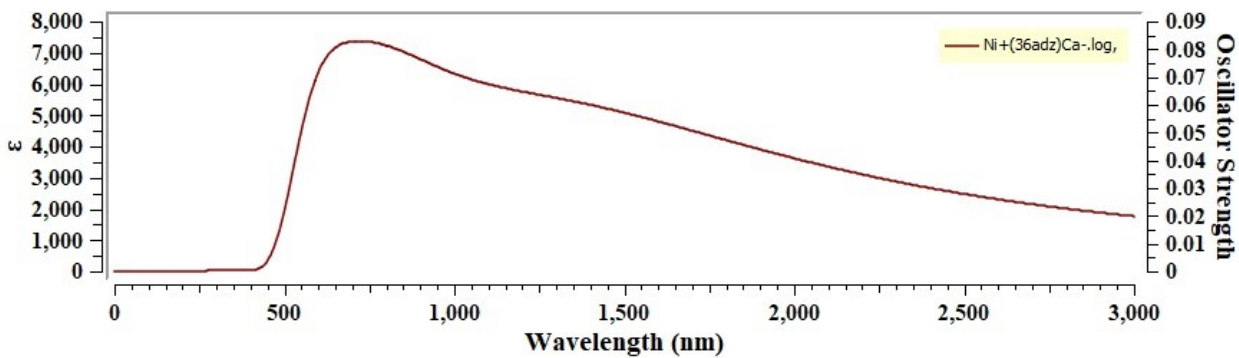

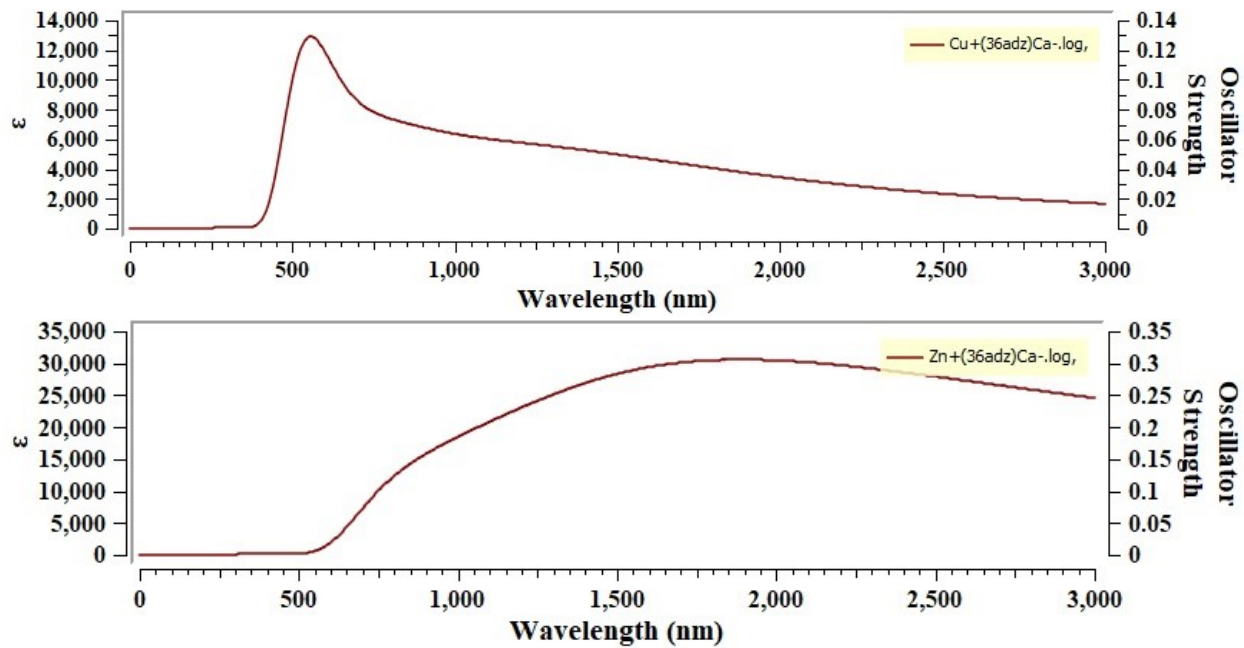

**Fig S3.** The UV absorption spectra of  $M^+(3^6adz)Ca^-$  ( $M^+= V$  to  $Zn$ ) series
